# Supplementary material for: Mobilizing knowledge on cognitive aging with HIV
Source: Research Square preprint supplement (doi:10.21203/rs.3.rs-7237174/v1), 2025-08-04
Supplement: Supplementary file 1 [file f46bfb841a951caf95a988c7.docx]

Additional File 1: Unlocking Vitality Program

| Day One – Focus on Aging: Monday, February 12, 2024 |
| --- |
| - 11:00AM PST – Welcome, opening, land acknowledgement. |
| - 11:15AM PST – Context Presentation (Murzin, Eaton, Landy, Ibáñez-Carrasco) |
| - 11:30AM PST – Realize/PANACHE: Preferences and concerns of Canadians aging with HIV (Murzin, Da Silva) |
| - 12:10PM PST – HIV in MOTION (Ibáñez-Carrasco) |
| - 12:30PM PST – Exploring cognitive remediation group therapy (CRGT) as an effective form of psychosocial support and its adaptation for online use (Muchenje & Eaton) |
| - 12:50PM PST – Happy Older Latino Adults (HOLA) health promotion intervention for older HIV-positive Latino men. (Jimenez) |
| - 1:10PM PST – Discussion on Speaker Presentations (Landy) |
| - 1:25PM PST – Wrap Up and Conclusion for the day. |
| Day Two – Focus on Cognition: Tuesday, February 13, 2024 |
| - 9:00AM PST – Welcome, opening, land acknowledgement (Ibáñez-Carrasco) |
| - 9:15AM PST – Implementation of frailty screening in people living with HIV: lessons from the Silver Clinic (Vera) |
| - 9:45AM PST – HEADS UP 2 (Landy, Anderson) |
| - 10:25AM PST – Summary and Discussion (community members) |
| - 10:45AM PST – Keynote Address – MyLifeMyMind (Brouillette) |
| - 11:25AM PST – Closing and Evaluation |
